# Supplementary material for: Physical Inactivity in Pulmonary Sarcoidosis
Source: Springer Nature journal article supplement (doi:10.1007/s00408-019-00215-6), 2019-03-19
Supplement: MOESM1 [file 408_2019_215_MOESM1_ESM.pdf]

**Table E1.** The relationship between physical activity, fatigue and quality of life in participants with sarcoidosis.

|                       | <b>Correlation coefficient</b>                                | <b>p-value</b> |
|-----------------------|---------------------------------------------------------------|----------------|
|                       | <b>Subjective physical activity (overall IPAQ)*</b>           |                |
| FAS                   | 0.283                                                         | 0.325          |
| KSQ                   |                                                               |                |
| General Health        | -0.491                                                        | 0.077          |
| Lung                  | -0.555                                                        | 0.042          |
| General Health + Lung | -0.407                                                        | 0.148          |
|                       | <b>Objective physical activity (mean daily step counts) †</b> |                |
| FAS                   | 0.041                                                         | 0.884          |
| KSQ                   |                                                               |                |
| General Health        | -0.384                                                        | 0.157          |
| Lung                  | -0.196                                                        | 0.484          |
| General Health + Lung | -0.443                                                        | 0.099          |

IPAQ = International Physical Activity Questionnaire; FAS = Fatigue Assessment Scale; KSQ = King's Sarcoidosis Questionnaire

\*Spearman's rank correlation. †Pearson's correlation
