# Supplementary material for: Physical Inactivity in Pulmonary Sarcoidosis
Source: Springer Nature journal article supplement (doi:10.1007/s00408-019-00215-6), 2019-03-19
Supplement: MOESM2 [file 408_2019_215_MOESM2_ESM.pdf]

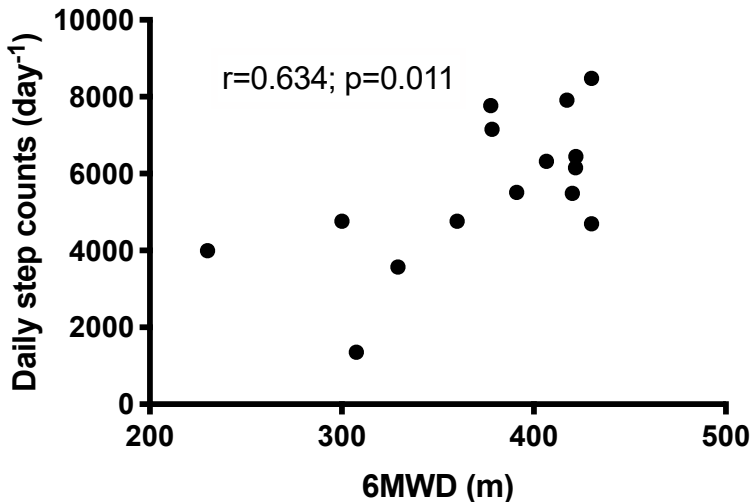

**Figure E1.** The relationship between 6-minute walk distance and daily step count in participants with sarcoidosis.

6WMD = 6-minute walk distance
